# Supplementary material for: Dual role for Drosophila lethal of scute in CNS midline precursor formation and dopaminergic neuron and motoneuron cell fate
Source: Oxford University Press journal article supplement (doi:10.1242/dev.056507), 2011-05-10
Supplement: dev056507tables1.pdf [file dev056507tables1.pdf]

**Table S1. Summary of *sc<sup>M6</sup>*, *Df(1)sc10-1* and *Df(1)ase-1* mutant genetic data**

| Gene         | Cell type | Wild type |          |           |             | <i>sc<sup>M6</sup></i> |           |           |             | <i>Df(1)sc10-1</i> |          |           |             | <i>Df(1)ase-1</i> |          |           |             |
|--------------|-----------|-----------|----------|-----------|-------------|------------------------|-----------|-----------|-------------|--------------------|----------|-----------|-------------|-------------------|----------|-----------|-------------|
|              |           | No cells  | One cell | Two cells | Three cells | No cells               | One cell  | Two cells | Three cells | No cells           | One cell | Two cells | Three cells | No cells          | One cell | Two cells | Three cells |
| <i>BarH1</i> | H-cell    | 0         | 50 (100) | 0         | 0           | 0                      | 80 (100)  | 0         | 0           |                    |          |           |             |                   |          |           |             |
| <i>DAT</i>   | H-cell    | 0         | 50 (100) | 0         | 0           | 0                      | 96 (100)  | 0         | 0           |                    |          |           |             | 0                 | 24 (100) | 0         | 0           |
| <i>NPFR1</i> | H-cell    | 0         | 46 (100) | 0         | 0           | 0                      | 108 (100) | 0         | 0           | 0                  | 21 (100) | 0         | 0           |                   |          |           |             |
| <i>ple</i>   | H-cell    | 0         | 92 (100) | 0         | 0           | 6 (2)                  | 292 (98)  | 0         | 0           | 0                  | 21 (100) | 0         | 0           | 0                 | 23 (100) | 0         | 0           |
| <i>SoxN</i>  | H-cell    | 0         | 50 (100) | 0         | 0           | 0                      | 64 (100)  | 0         | 0           |                    |          |           |             |                   |          |           |             |
| <i>tup</i>   | H-cell    | 0         | 44 (100) | 0         | 0           | 0                      | 80 (100)  | 0         | 0           |                    |          |           |             |                   |          |           |             |
| <i>Vmat</i>  | H-cell    | 0         | 34 (100) | 0         | 0           | 6 (8)                  | 68 (92)   | 0         | 0           |                    |          |           |             |                   |          |           |             |
| <i>Tbh</i>   | mVUM      | 0         | 0        | 0         | 44 (100)    |                        |           |           |             | 0                  | 0        | 0         | 23 (100)    | 0                 | 0        | 0         | 18 (100)    |
| <i>wor</i>   | MNB       | 0         | 42 (100) | 0         | 0           |                        |           |           |             | 0                  | 22 (100) | 0         | 0           | 0                 | 20 (100) | 0         | 0           |

Values represent the number of segments in which none, one, two or three cells expressed the gene. Percentages are indicated in parentheses.  $P > 0.1737$ .
