# Supplementary material for: Dual role for Drosophila lethal of scute in CNS midline precursor formation and dopaminergic neuron and motoneuron cell fate
Source: Oxford University Press journal article supplement (doi:10.1242/dev.056507), 2011-05-10
Supplement: dev056507tables2.pdf [file dev056507tables2.pdf]

Table S2. *Df(1)sc-B57* rescue data

| Gene       | Cell type | Wild type |          |           | <i>Df(1)sc-B57</i> |          |           | <i>Df(1)sc-B57 sim-Gal4 UAS-I(1)sc</i> |          |           |
|------------|-----------|-----------|----------|-----------|--------------------|----------|-----------|----------------------------------------|----------|-----------|
|            |           | No cells  | One cell | Two cells | No cells           | One cell | Two cells | No cells                               | One cell | Two cells |
| <i>ple</i> | H-cell    | 0         | 92 (100) | 0         | 13 (76)            | 4 (24)   | 0         | 2 (8)                                  | 22 (88)  | 1 (4)     |
| <i>wor</i> | MNB       | 0         | 42 (100) | 0         | 13 (93)            | 1 (7)    | 0         | 0                                      | 25 (100) | 0         |

Rescue of *Df(1)sc-B57* mutants by *sim-Gal4 UAS-I(1)sc*. Values represent the number of segments, and percentages are indicated in parentheses.  $P=0.0442$  for H-cell (*ple* expression) wild type/rescue;  $P<0.0001$  for *Df(1)sc-B57*/rescue;  $P=1.000$  for MNB (*wor* expression) wild type/rescue;  $P<0.0001$  for *Df(1)sc-B57*/rescue.
